# Supplementary material for: Triggering N2 uptake via redox-induced expulsion of coordinated NH3 and N2 silylation at trigonal bipyramidal iron
Source: Springer Nature journal article supplement (doi:10.1038/nchem.660), 2010-05-16
Supplement: 41557_2010_BFnchem660_MOESM4_ESM.cif [file 41557_2010_BFnchem660_MOESM4_ESM.cif]

  
data_07202 
  
_audit_creation_method            SHELXL-97 
_chemical_name_systematic 
; 
 ? 
; 
_chemical_name_common             1b 
_chemical_melting_point           ? 
_chemical_formula_moiety          ? 
_chemical_formula_sum 
 'C37 H57 Fe P3 Si' 
_chemical_formula_weight          678.68 
  
loop_ 
 _atom_type_symbol 
 _atom_type_description 
 _atom_type_scat_dispersion_real 
 _atom_type_scat_dispersion_imag 
 _atom_type_scat_source 
 'C'  'C'   0.0033   0.0016 
 'International Tables Vol C Tables 4.2.6.8 and 6.1.1.4' 
 'H'  'H'   0.0000   0.0000 
 'International Tables Vol C Tables 4.2.6.8 and 6.1.1.4' 
 'Si'  'Si'   0.0817   0.0704 
 'International Tables Vol C Tables 4.2.6.8 and 6.1.1.4' 
 'P'  'P'   0.1023   0.0942 
 'International Tables Vol C Tables 4.2.6.8 and 6.1.1.4' 
 'Fe'  'Fe'   0.3463   0.8444 
 'International Tables Vol C Tables 4.2.6.8 and 6.1.1.4' 
  
_symmetry_cell_setting            Orthorhombic 
_symmetry_space_group_name_H-M    Pbca 
  
loop_ 
 _symmetry_equiv_pos_as_xyz 
 'x, y, z' 
 '-x+1/2, -y, z+1/2' 
 '-x, y+1/2, -z+1/2' 
 'x+1/2, -y+1/2, -z' 
 '-x, -y, -z' 
 'x-1/2, y, -z-1/2' 
 'x, -y-1/2, z-1/2' 
 '-x-1/2, y-1/2, z' 
  
_cell_length_a                    16.0034(12) 
_cell_length_b                    17.0180(13) 
_cell_length_c                    26.118(2) 
_cell_angle_alpha                 90.00 
_cell_angle_beta                  90.00 
_cell_angle_gamma                 90.00 
_cell_volume                      7113.2(9) 
_cell_formula_units_Z             8 
_cell_measurement_temperature     100(2) 
_cell_measurement_reflns_used     9755 
_cell_measurement_theta_min       2.52 
_cell_measurement_theta_max       30.56 
  
_exptl_crystal_description        block 
_exptl_crystal_colour             orange 
_exptl_crystal_size_max           0.20 
_exptl_crystal_size_mid           0.15 
_exptl_crystal_size_min           0.10 
_exptl_crystal_density_meas       1.267
_exptl_crystal_density_diffrn     1.267 
_exptl_crystal_density_method     'not measured' 
_exptl_crystal_F_000              2912 
_exptl_absorpt_coefficient_mu     0.618 
_exptl_absorpt_correction_type    multi-scan 
_exptl_absorpt_correction_T_min   0.8864 
_exptl_absorpt_correction_T_max   0.9408 
_exptl_absorpt_process_details    ? 
  
_exptl_special_details 
; 
 ? 
; 
  
_diffrn_ambient_temperature       100(2) 
_diffrn_radiation_wavelength      0.71073 
_diffrn_radiation_type            MoK\a 
_diffrn_radiation_source          'fine-focus sealed tube' 
_diffrn_radiation_monochromator   graphite 
_diffrn_measurement_device_type   'CCD area detector' 
_diffrn_measurement_method        'phi and omega scans' 
_diffrn_detector_area_resol_mean  ? 
_diffrn_standards_number          ? 
_diffrn_standards_interval_count  ? 
_diffrn_standards_interval_time   ? 
_diffrn_standards_decay_%         ? 
_diffrn_reflns_number             181144 
_diffrn_reflns_av_R_equivalents   0.0858 
_diffrn_reflns_av_sigmaI/netI     0.0350 
_diffrn_reflns_limit_h_min        -22 
_diffrn_reflns_limit_h_max        22 
_diffrn_reflns_limit_k_min        -24 
_diffrn_reflns_limit_k_max        24 
_diffrn_reflns_limit_l_min        -37 
_diffrn_reflns_limit_l_max        36 
_diffrn_reflns_theta_min          1.91 
_diffrn_reflns_theta_max          30.72 
_reflns_number_total              11005 
_reflns_number_gt                 8424 
_reflns_threshold_expression      >2sigma(I) 
  
_computing_data_collection        'Bruker SMART' 
_computing_cell_refinement        'Bruker SMART' 
_computing_data_reduction         'Bruker SAINT' 
_computing_structure_solution     'SHELXS-97 (Sheldrick, 1990)' 
_computing_structure_refinement   'SHELXL-97 (Sheldrick, 1997)' 
_computing_molecular_graphics     'Bruker SHELXTL' 
_computing_publication_material   'Bruker SHELXTL' 
  
_refine_special_details 
; 
 Refinement of F^2^ against ALL reflections.  The weighted R-factor wR and 
 goodness of fit S are based on F^2^, conventional R-factors R are based 
 on F, with F set to zero for negative F^2^. The threshold expression of 
 F^2^ > 2sigma(F^2^) is used only for calculating R-factors(gt) etc. and is 
 not relevant to the choice of reflections for refinement.  R-factors based 
 on F^2^ are statistically about twice as large as those based on F, and R- 
 factors based on ALL data will be even larger. 
; 
  
_refine_ls_structure_factor_coef  Fsqd 
_refine_ls_matrix_type            full 
_refine_ls_weighting_scheme       calc 
_refine_ls_weighting_details 
 'calc w=1/[\s^2^(Fo^2^)+(0.0559P)^2^+5.0756P] where P=(Fo^2^+2Fc^2^)/3' 
_atom_sites_solution_primary      direct 
_atom_sites_solution_secondary    difmap 
_atom_sites_solution_hydrogens    geom 
_refine_ls_hydrogen_treatment     constr 
_refine_ls_extinction_method      none 
_refine_ls_extinction_coef        ? 
_refine_ls_number_reflns          11005 
_refine_ls_number_parameters      392 
_refine_ls_number_restraints      0 
_refine_ls_R_factor_all           0.0601 
_refine_ls_R_factor_gt            0.0379 
_refine_ls_wR_factor_ref          0.1070 
_refine_ls_wR_factor_gt           0.0913 
_refine_ls_goodness_of_fit_ref    0.978 
_refine_ls_restrained_S_all       0.978 
_refine_ls_shift/su_max           0.003 
_refine_ls_shift/su_mean          0.000 
  
loop_ 
 _atom_site_label 
 _atom_site_type_symbol 
 _atom_site_fract_x 
 _atom_site_fract_y 
 _atom_site_fract_z 
 _atom_site_U_iso_or_equiv 
 _atom_site_adp_type 
 _atom_site_occupancy 
 _atom_site_symmetry_multiplicity 
 _atom_site_calc_flag 
 _atom_site_refinement_flags 
 _atom_site_disorder_assembly 
 _atom_site_disorder_group 
Fe1 Fe 0.996297(14) 0.174354(13) 0.643363(9) 0.01214(6) Uani 1 1 d . . . 
P1 P 0.96761(3) 0.19788(2) 0.729755(16) 0.01345(9) Uani 1 1 d . . . 
P2 P 1.06187(3) 0.27938(2) 0.600073(17) 0.01456(9) Uani 1 1 d . . . 
P3 P 0.90186(3) 0.09508(2) 0.600151(16) 0.01373(9) Uani 1 1 d . . . 
Si1 Si 0.88482(3) 0.26016(3) 0.635083(18) 0.01312(9) Uani 1 1 d . . . 
C1 C 0.86554(10) 0.31714(9) 0.69646(6) 0.0147(3) Uani 1 1 d . . . 
C2 C 0.91028(10) 0.29036(9) 0.73962(6) 0.0145(3) Uani 1 1 d . . . 
C3 C 0.90549(11) 0.33085(10) 0.78612(7) 0.0182(3) Uani 1 1 d . . . 
H3 H 0.9371 0.3133 0.8147 0.022 Uiso 1 1 calc R . . 
C4 C 0.85445(12) 0.39684(11) 0.79073(8) 0.0230(4) Uani 1 1 d . . . 
H4 H 0.8504 0.4236 0.8225 0.028 Uiso 1 1 calc R . . 
C5 C 0.80950(12) 0.42330(11) 0.74860(8) 0.0235(4) Uani 1 1 d . . . 
H5 H 0.7747 0.4683 0.7516 0.028 Uiso 1 1 calc R . . 
C6 C 0.81539(11) 0.38393(10) 0.70192(7) 0.0190(3) Uani 1 1 d . . . 
H6 H 0.7848 0.4028 0.6733 0.023 Uiso 1 1 calc R . . 
C7 C 0.98594(10) 0.33501(9) 0.56187(6) 0.0151(3) Uani 1 1 d . . . 
C8 C 0.90312(10) 0.33281(9) 0.58044(6) 0.0147(3) Uani 1 1 d . . . 
C9 C 0.84162(11) 0.37404(10) 0.55330(7) 0.0177(3) Uani 1 1 d . . . 
H9 H 0.7859 0.3745 0.5658 0.021 Uiso 1 1 calc R . . 
C10 C 0.86044(11) 0.41434(10) 0.50842(7) 0.0204(3) Uani 1 1 d . . . 
H10 H 0.8177 0.4415 0.4904 0.024 Uiso 1 1 calc R . . 
C11 C 0.94190(12) 0.41478(11) 0.48994(7) 0.0217(4) Uani 1 1 d . . . 
H11 H 0.9547 0.4414 0.4590 0.026 Uiso 1 1 calc R . . 
C12 C 1.00457(11) 0.37612(10) 0.51693(7) 0.0186(3) Uani 1 1 d . . . 
H12 H 1.0605 0.3777 0.5047 0.022 Uiso 1 1 calc R . . 
C13 C 0.79239(10) 0.12749(10) 0.60585(6) 0.0151(3) Uani 1 1 d . . . 
C14 C 0.78312(10) 0.20770(10) 0.61724(6) 0.0149(3) Uani 1 1 d . . . 
C15 C 0.70266(10) 0.24034(10) 0.61454(7) 0.0175(3) Uani 1 1 d . . . 
H15 H 0.6951 0.2945 0.6220 0.021 Uiso 1 1 calc R . . 
C16 C 0.63370(11) 0.19489(11) 0.60117(7) 0.0199(3) Uani 1 1 d . . . 
H16 H 0.5801 0.2185 0.5982 0.024 Uiso 1 1 calc R . . 
C17 C 0.64344(11) 0.11506(11) 0.59224(7) 0.0199(3) Uani 1 1 d . . . 
H17 H 0.5961 0.0836 0.5844 0.024 Uiso 1 1 calc R . . 
C18 C 0.72257(11) 0.08085(11) 0.59469(6) 0.0183(3) Uani 1 1 d . . . 
H18 H 0.7291 0.0261 0.5888 0.022 Uiso 1 1 calc R . . 
C19 C 0.90015(10) 0.12881(10) 0.76814(6) 0.0161(3) Uani 1 1 d . . . 
H19 H 0.9200 0.0742 0.7609 0.019 Uiso 1 1 calc R . . 
C20 C 0.80975(10) 0.13422(11) 0.74955(7) 0.0198(3) Uani 1 1 d . . . 
H20A H 0.7768 0.0919 0.7650 0.030 Uiso 1 1 calc R . . 
H20B H 0.8083 0.1291 0.7122 0.030 Uiso 1 1 calc R . . 
H20C H 0.7862 0.1851 0.7595 0.030 Uiso 1 1 calc R . . 
C21 C 0.90089(12) 0.13980(11) 0.82636(7) 0.0214(3) Uani 1 1 d . . . 
H21A H 0.8788 0.1919 0.8349 0.032 Uiso 1 1 calc R . . 
H21B H 0.9583 0.1352 0.8391 0.032 Uiso 1 1 calc R . . 
H21C H 0.8660 0.0993 0.8424 0.032 Uiso 1 1 calc R . . 
C22 C 1.06017(10) 0.20359(10) 0.77243(6) 0.0164(3) Uani 1 1 d . . . 
H22 H 1.0409 0.2219 0.8068 0.020 Uiso 1 1 calc R . . 
C23 C 1.09909(11) 0.12171(11) 0.77888(7) 0.0197(3) Uani 1 1 d . . . 
H23A H 1.1155 0.1012 0.7453 0.030 Uiso 1 1 calc R . . 
H23B H 1.0582 0.0862 0.7945 0.030 Uiso 1 1 calc R . . 
H23C H 1.1485 0.1254 0.8009 0.030 Uiso 1 1 calc R . . 
C24 C 1.12440(11) 0.26219(11) 0.75254(7) 0.0207(3) Uani 1 1 d . . . 
H24A H 1.1708 0.2660 0.7769 0.031 Uiso 1 1 calc R . . 
H24B H 1.0981 0.3139 0.7486 0.031 Uiso 1 1 calc R . . 
H24C H 1.1456 0.2444 0.7193 0.031 Uiso 1 1 calc R . . 
C25 C 1.11557(11) 0.36271(10) 0.63510(7) 0.0184(3) Uani 1 1 d . . . 
H25 H 1.1544 0.3383 0.6606 0.022 Uiso 1 1 calc R . . 
C26 C 1.05317(12) 0.41225(11) 0.66527(8) 0.0229(4) Uani 1 1 d . . . 
H26A H 1.0834 0.4478 0.6882 0.034 Uiso 1 1 calc R . . 
H26B H 1.0170 0.3777 0.6855 0.034 Uiso 1 1 calc R . . 
H26C H 1.0190 0.4430 0.6415 0.034 Uiso 1 1 calc R . . 
C27 C 1.16845(12) 0.41721(11) 0.60101(8) 0.0243(4) Uani 1 1 d . . . 
H27A H 1.1326 0.4416 0.5751 0.036 Uiso 1 1 calc R . . 
H27B H 1.2123 0.3865 0.5841 0.036 Uiso 1 1 calc R . . 
H27C H 1.1941 0.4582 0.6222 0.036 Uiso 1 1 calc R . . 
C28 C 1.14538(11) 0.25209(10) 0.55345(7) 0.0188(3) Uani 1 1 d . . . 
H28 H 1.1601 0.3003 0.5335 0.023 Uiso 1 1 calc R . . 
C29 C 1.22474(11) 0.22396(12) 0.58095(8) 0.0245(4) Uani 1 1 d . . . 
H29A H 1.2130 0.1748 0.5991 0.037 Uiso 1 1 calc R . . 
H29B H 1.2428 0.2640 0.6056 0.037 Uiso 1 1 calc R . . 
H29C H 1.2691 0.2152 0.5558 0.037 Uiso 1 1 calc R . . 
C30 C 1.11491(12) 0.19021(11) 0.51556(7) 0.0228(4) Uani 1 1 d . . . 
H30A H 1.1604 0.1765 0.4921 0.034 Uiso 1 1 calc R . . 
H30B H 1.0676 0.2112 0.4960 0.034 Uiso 1 1 calc R . . 
H30C H 1.0971 0.1432 0.5343 0.034 Uiso 1 1 calc R . . 
C31 C 0.89819(11) -0.01180(10) 0.61749(7) 0.0173(3) Uani 1 1 d . . . 
H31 H 0.8466 -0.0343 0.6016 0.021 Uiso 1 1 calc R . . 
C32 C 0.89097(12) -0.02369(11) 0.67519(7) 0.0218(4) Uani 1 1 d . . . 
H32A H 0.8852 -0.0799 0.6827 0.033 Uiso 1 1 calc R . . 
H32B H 0.8418 0.0045 0.6880 0.033 Uiso 1 1 calc R . . 
H32C H 0.9412 -0.0033 0.6920 0.033 Uiso 1 1 calc R . . 
C33 C 0.97274(12) -0.05828(10) 0.59653(7) 0.0207(3) Uani 1 1 d . . . 
H33A H 1.0243 -0.0393 0.6125 0.031 Uiso 1 1 calc R . . 
H33B H 0.9762 -0.0511 0.5594 0.031 Uiso 1 1 calc R . . 
H33C H 0.9653 -0.1142 0.6043 0.031 Uiso 1 1 calc R . . 
C34 C 0.90917(11) 0.08809(10) 0.52838(6) 0.0169(3) Uani 1 1 d . . . 
H34 H 0.9681 0.0735 0.5199 0.020 Uiso 1 1 calc R . . 
C35 C 0.89180(12) 0.16780(11) 0.50303(7) 0.0220(4) Uani 1 1 d . . . 
H35A H 0.9037 0.1643 0.4663 0.033 Uiso 1 1 calc R . . 
H35B H 0.9276 0.2080 0.5185 0.033 Uiso 1 1 calc R . . 
H35C H 0.8330 0.1820 0.5081 0.033 Uiso 1 1 calc R . . 
C36 C 0.85234(12) 0.02712(11) 0.50291(7) 0.0219(4) Uani 1 1 d . . . 
H36A H 0.7938 0.0427 0.5073 0.033 Uiso 1 1 calc R . . 
H36B H 0.8614 -0.0243 0.5188 0.033 Uiso 1 1 calc R . . 
H36C H 0.8655 0.0240 0.4663 0.033 Uiso 1 1 calc R . . 
C37 C 1.09354(10) 0.09584(10) 0.64737(6) 0.0158(3) Uani 1 1 d . . . 
H37A H 1.0770 0.0507 0.6684 0.024 Uiso 1 1 calc R . . 
H37B H 1.1422 0.1215 0.6628 0.024 Uiso 1 1 calc R . . 
H37C H 1.1078 0.0778 0.6128 0.024 Uiso 1 1 calc R . . 
  
loop_ 
 _atom_site_aniso_label 
 _atom_site_aniso_U_11 
 _atom_site_aniso_U_22 
 _atom_site_aniso_U_33 
 _atom_site_aniso_U_23 
 _atom_site_aniso_U_13 
 _atom_site_aniso_U_12 
Fe1 0.01219(11) 0.01076(11) 0.01347(11) -0.00020(8) 0.00044(8) 0.00076(8) 
P1 0.01264(18) 0.01357(19) 0.01416(19) -0.00065(15) -0.00041(14) 0.00064(14) 
P2 0.01373(19) 0.01290(19) 0.0170(2) 0.00151(15) 0.00149(15) 0.00065(14) 
P3 0.01479(19) 0.01243(19) 0.01397(19) -0.00105(15) -0.00033(14) 0.00010(14) 
Si1 0.01282(19) 0.0120(2) 0.0145(2) 0.00004(16) 0.00024(16) 0.00086(15) 
C1 0.0134(7) 0.0123(7) 0.0185(8) -0.0006(6) 0.0020(6) -0.0005(5) 
C2 0.0137(7) 0.0130(7) 0.0168(8) -0.0011(6) 0.0012(6) -0.0009(5) 
C3 0.0185(8) 0.0165(8) 0.0197(8) -0.0040(6) -0.0026(6) 0.0006(6) 
C4 0.0250(9) 0.0197(9) 0.0244(9) -0.0094(7) 0.0009(7) 0.0016(7) 
C5 0.0244(9) 0.0176(8) 0.0286(10) -0.0053(7) -0.0008(7) 0.0053(7) 
C6 0.0180(8) 0.0153(8) 0.0237(9) -0.0016(7) -0.0021(6) 0.0028(6) 
C7 0.0166(7) 0.0125(7) 0.0160(7) -0.0004(6) 0.0020(6) 0.0006(5) 
C8 0.0169(7) 0.0110(7) 0.0162(7) 0.0000(6) 0.0000(6) 0.0005(5) 
C9 0.0170(7) 0.0164(8) 0.0198(8) 0.0005(6) 0.0007(6) 0.0027(6) 
C10 0.0215(8) 0.0175(8) 0.0221(8) 0.0036(7) -0.0011(7) 0.0049(6) 
C11 0.0254(9) 0.0206(9) 0.0192(8) 0.0057(7) 0.0008(7) 0.0021(7) 
C12 0.0190(8) 0.0169(8) 0.0199(8) 0.0024(6) 0.0035(6) 0.0011(6) 
C13 0.0156(7) 0.0162(7) 0.0137(7) 0.0002(6) -0.0003(6) -0.0013(6) 
C14 0.0147(7) 0.0182(8) 0.0119(7) 0.0005(6) -0.0006(6) -0.0002(6) 
C15 0.0162(7) 0.0203(8) 0.0160(8) 0.0027(6) 0.0008(6) 0.0022(6) 
C16 0.0136(7) 0.0289(9) 0.0171(8) 0.0037(7) -0.0002(6) 0.0008(6) 
C17 0.0156(7) 0.0283(9) 0.0157(8) 0.0006(7) -0.0018(6) -0.0052(7) 
C18 0.0182(8) 0.0204(8) 0.0163(8) -0.0010(6) -0.0008(6) -0.0025(6) 
C19 0.0152(7) 0.0162(8) 0.0170(8) -0.0008(6) 0.0010(6) 0.0003(6) 
C20 0.0160(7) 0.0193(8) 0.0241(9) 0.0014(7) 0.0015(6) -0.0012(6) 
C21 0.0238(9) 0.0227(9) 0.0177(8) 0.0007(7) 0.0031(7) 0.0000(7) 
C22 0.0139(7) 0.0198(8) 0.0155(7) -0.0013(6) -0.0029(6) 0.0010(6) 
C23 0.0174(8) 0.0243(9) 0.0174(8) 0.0016(7) -0.0024(6) 0.0040(6) 
C24 0.0176(8) 0.0223(8) 0.0220(9) -0.0007(7) -0.0035(6) -0.0013(6) 
C25 0.0173(8) 0.0157(8) 0.0223(8) 0.0020(6) 0.0003(6) -0.0020(6) 
C26 0.0232(9) 0.0183(8) 0.0271(9) -0.0035(7) 0.0023(7) -0.0040(7) 
C27 0.0233(9) 0.0198(9) 0.0298(10) 0.0041(7) 0.0020(7) -0.0051(7) 
C28 0.0169(7) 0.0171(8) 0.0223(8) 0.0026(6) 0.0060(6) 0.0026(6) 
C29 0.0163(8) 0.0248(9) 0.0325(10) 0.0055(8) 0.0056(7) 0.0036(7) 
C30 0.0254(9) 0.0201(8) 0.0229(9) 0.0000(7) 0.0084(7) 0.0024(7) 
C31 0.0196(8) 0.0135(7) 0.0189(8) -0.0010(6) -0.0006(6) -0.0011(6) 
C32 0.0275(9) 0.0178(8) 0.0202(8) 0.0014(7) 0.0027(7) -0.0020(7) 
C33 0.0257(9) 0.0157(8) 0.0208(8) -0.0014(7) -0.0006(7) 0.0034(7) 
C34 0.0179(7) 0.0178(8) 0.0151(7) -0.0024(6) -0.0005(6) 0.0004(6) 
C35 0.0287(9) 0.0201(9) 0.0173(8) 0.0003(7) 0.0002(7) 0.0017(7) 
C36 0.0262(9) 0.0216(9) 0.0180(8) -0.0038(7) -0.0023(7) -0.0014(7) 
C37 0.0170(7) 0.0140(7) 0.0163(8) 0.0012(6) 0.0007(6) 0.0007(6) 
  
_geom_special_details 
; 
 All esds (except the esd in the dihedral angle between two l.s. planes) 
 are estimated using the full covariance matrix.  The cell esds are taken 
 into account individually in the estimation of esds in distances, angles 
 and torsion angles; correlations between esds in cell parameters are only 
 used when they are defined by crystal symmetry.  An approximate (isotropic) 
 treatment of cell esds is used for estimating esds involving l.s. planes. 
; 
  
loop_ 
 _geom_bond_atom_site_label_1 
 _geom_bond_atom_site_label_2 
 _geom_bond_distance 
 _geom_bond_site_symmetry_2 
 _geom_bond_publ_flag 
Fe1 C37 2.0538(16) . ? 
Fe1 Si1 2.3155(5) . ? 
Fe1 P3 2.3190(5) . ? 
Fe1 P1 2.3372(5) . ? 
Fe1 P2 2.3610(5) . ? 
P1 C2 1.8398(17) . ? 
P1 C22 1.8563(17) . ? 
P1 C19 1.8847(17) . ? 
P2 C7 1.8354(17) . ? 
P2 C28 1.8667(17) . ? 
P2 C25 1.8939(18) . ? 
P3 C13 1.8427(17) . ? 
P3 C31 1.8754(17) . ? 
P3 C34 1.8820(17) . ? 
Si1 C1 1.8988(17) . ? 
Si1 C8 1.9107(17) . ? 
Si1 C14 1.9139(17) . ? 
C1 C6 1.399(2) . ? 
C1 C2 1.411(2) . ? 
C2 C3 1.399(2) . ? 
C3 C4 1.394(2) . ? 
C3 H3 0.9500 . ? 
C4 C5 1.390(3) . ? 
C4 H4 0.9500 . ? 
C5 C6 1.394(3) . ? 
C5 H5 0.9500 . ? 
C6 H6 0.9500 . ? 
C7 C12 1.398(2) . ? 
C7 C8 1.412(2) . ? 
C8 C9 1.401(2) . ? 
C9 C10 1.391(2) . ? 
C9 H9 0.9500 . ? 
C10 C11 1.390(3) . ? 
C10 H10 0.9500 . ? 
C11 C12 1.391(2) . ? 
C11 H11 0.9500 . ? 
C12 H12 0.9500 . ? 
C13 C18 1.401(2) . ? 
C13 C14 1.405(2) . ? 
C14 C15 1.404(2) . ? 
C15 C16 1.392(2) . ? 
C15 H15 0.9500 . ? 
C16 C17 1.387(3) . ? 
C16 H16 0.9500 . ? 
C17 C18 1.395(2) . ? 
C17 H17 0.9500 . ? 
C18 H18 0.9500 . ? 
C19 C20 1.529(2) . ? 
C19 C21 1.532(2) . ? 
C19 H19 1.0000 . ? 
C20 H20A 0.9800 . ? 
C20 H20B 0.9800 . ? 
C20 H20C 0.9800 . ? 
C21 H21A 0.9800 . ? 
C21 H21B 0.9800 . ? 
C21 H21C 0.9800 . ? 
C22 C24 1.524(2) . ? 
C22 C23 1.536(2) . ? 
C22 H22 1.0000 . ? 
C23 H23A 0.9800 . ? 
C23 H23B 0.9800 . ? 
C23 H23C 0.9800 . ? 
C24 H24A 0.9800 . ? 
C24 H24B 0.9800 . ? 
C24 H24C 0.9800 . ? 
C25 C26 1.526(3) . ? 
C25 C27 1.539(2) . ? 
C25 H25 1.0000 . ? 
C26 H26A 0.9800 . ? 
C26 H26B 0.9800 . ? 
C26 H26C 0.9800 . ? 
C27 H27A 0.9800 . ? 
C27 H27B 0.9800 . ? 
C27 H27C 0.9800 . ? 
C28 C30 1.525(3) . ? 
C28 C29 1.536(3) . ? 
C28 H28 1.0000 . ? 
C29 H29A 0.9800 . ? 
C29 H29B 0.9800 . ? 
C29 H29C 0.9800 . ? 
C30 H30A 0.9800 . ? 
C30 H30B 0.9800 . ? 
C30 H30C 0.9800 . ? 
C31 C32 1.525(3) . ? 
C31 C33 1.533(2) . ? 
C31 H31 1.0000 . ? 
C32 H32A 0.9800 . ? 
C32 H32B 0.9800 . ? 
C32 H32C 0.9800 . ? 
C33 H33A 0.9800 . ? 
C33 H33B 0.9800 . ? 
C33 H33C 0.9800 . ? 
C34 C36 1.532(2) . ? 
C34 C35 1.535(2) . ? 
C34 H34 1.0000 . ? 
C35 H35A 0.9800 . ? 
C35 H35B 0.9800 . ? 
C35 H35C 0.9800 . ? 
C36 H36A 0.9800 . ? 
C36 H36B 0.9800 . ? 
C36 H36C 0.9800 . ? 
C37 H37A 0.9800 . ? 
C37 H37B 0.9800 . ? 
C37 H37C 0.9800 . ? 
  
loop_ 
 _geom_angle_atom_site_label_1 
 _geom_angle_atom_site_label_2 
 _geom_angle_atom_site_label_3 
 _geom_angle 
 _geom_angle_site_symmetry_1 
 _geom_angle_site_symmetry_3 
 _geom_angle_publ_flag 
C37 Fe1 Si1 177.21(5) . . ? 
C37 Fe1 P3 98.05(5) . . ? 
Si1 Fe1 P3 79.590(18) . . ? 
C37 Fe1 P1 102.19(5) . . ? 
Si1 Fe1 P1 80.259(17) . . ? 
P3 Fe1 P1 116.202(18) . . ? 
C37 Fe1 P2 100.38(5) . . ? 
Si1 Fe1 P2 79.647(17) . . ? 
P3 Fe1 P2 119.800(19) . . ? 
P1 Fe1 P2 114.831(18) . . ? 
C2 P1 C22 105.61(8) . . ? 
C2 P1 C19 99.98(7) . . ? 
C22 P1 C19 99.81(8) . . ? 
C2 P1 Fe1 112.32(6) . . ? 
C22 P1 Fe1 115.59(6) . . ? 
C19 P1 Fe1 121.28(6) . . ? 
C7 P2 C28 104.34(8) . . ? 
C7 P2 C25 100.19(8) . . ? 
C28 P2 C25 100.17(8) . . ? 
C7 P2 Fe1 110.89(5) . . ? 
C28 P2 Fe1 116.25(6) . . ? 
C25 P2 Fe1 122.49(6) . . ? 
C13 P3 C31 103.94(8) . . ? 
C13 P3 C34 99.12(7) . . ? 
C31 P3 C34 100.44(8) . . ? 
C13 P3 Fe1 113.97(6) . . ? 
C31 P3 Fe1 117.84(6) . . ? 
C34 P3 Fe1 118.75(6) . . ? 
C1 Si1 C8 108.97(7) . . ? 
C1 Si1 C14 107.80(7) . . ? 
C8 Si1 C14 104.49(7) . . ? 
C1 Si1 Fe1 111.62(5) . . ? 
C8 Si1 Fe1 111.08(5) . . ? 
C14 Si1 Fe1 112.56(5) . . ? 
C6 C1 C2 118.18(15) . . ? 
C6 C1 Si1 126.46(13) . . ? 
C2 C1 Si1 115.28(12) . . ? 
C3 C2 C1 120.45(15) . . ? 
C3 C2 P1 124.78(13) . . ? 
C1 C2 P1 114.68(12) . . ? 
C4 C3 C2 120.27(16) . . ? 
C4 C3 H3 119.9 . . ? 
C2 C3 H3 119.9 . . ? 
C5 C4 C3 119.75(17) . . ? 
C5 C4 H4 120.1 . . ? 
C3 C4 H4 120.1 . . ? 
C4 C5 C6 120.11(17) . . ? 
C4 C5 H5 119.9 . . ? 
C6 C5 H5 119.9 . . ? 
C1 C6 C5 121.22(17) . . ? 
C1 C6 H6 119.4 . . ? 
C5 C6 H6 119.4 . . ? 
C12 C7 C8 120.12(15) . . ? 
C12 C7 P2 124.97(13) . . ? 
C8 C7 P2 114.90(12) . . ? 
C9 C8 C7 118.17(15) . . ? 
C9 C8 Si1 126.46(13) . . ? 
C7 C8 Si1 114.69(12) . . ? 
C10 C9 C8 121.41(16) . . ? 
C10 C9 H9 119.3 . . ? 
C8 C9 H9 119.3 . . ? 
C9 C10 C11 119.88(16) . . ? 
C9 C10 H10 120.1 . . ? 
C11 C10 H10 120.1 . . ? 
C12 C11 C10 119.84(17) . . ? 
C12 C11 H11 120.1 . . ? 
C10 C11 H11 120.1 . . ? 
C11 C12 C7 120.53(16) . . ? 
C11 C12 H12 119.7 . . ? 
C7 C12 H12 119.7 . . ? 
C18 C13 C14 120.68(15) . . ? 
C18 C13 P3 124.88(13) . . ? 
C14 C13 P3 114.09(12) . . ? 
C15 C14 C13 118.06(15) . . ? 
C15 C14 Si1 127.41(13) . . ? 
C13 C14 Si1 114.52(12) . . ? 
C16 C15 C14 121.32(16) . . ? 
C16 C15 H15 119.3 . . ? 
C14 C15 H15 119.3 . . ? 
C17 C16 C15 119.82(16) . . ? 
C17 C16 H16 120.1 . . ? 
C15 C16 H16 120.1 . . ? 
C16 C17 C18 120.19(16) . . ? 
C16 C17 H17 119.9 . . ? 
C18 C17 H17 119.9 . . ? 
C17 C18 C13 119.80(17) . . ? 
C17 C18 H18 120.1 . . ? 
C13 C18 H18 120.1 . . ? 
C20 C19 C21 108.37(14) . . ? 
C20 C19 P1 109.61(12) . . ? 
C21 C19 P1 116.58(12) . . ? 
C20 C19 H19 107.3 . . ? 
C21 C19 H19 107.3 . . ? 
P1 C19 H19 107.3 . . ? 
C19 C20 H20A 109.5 . . ? 
C19 C20 H20B 109.5 . . ? 
H20A C20 H20B 109.5 . . ? 
C19 C20 H20C 109.5 . . ? 
H20A C20 H20C 109.5 . . ? 
H20B C20 H20C 109.5 . . ? 
C19 C21 H21A 109.5 . . ? 
C19 C21 H21B 109.5 . . ? 
H21A C21 H21B 109.5 . . ? 
C19 C21 H21C 109.5 . . ? 
H21A C21 H21C 109.5 . . ? 
H21B C21 H21C 109.5 . . ? 
C24 C22 C23 110.96(14) . . ? 
C24 C22 P1 111.59(12) . . ? 
C23 C22 P1 110.00(12) . . ? 
C24 C22 H22 108.1 . . ? 
C23 C22 H22 108.1 . . ? 
P1 C22 H22 108.1 . . ? 
C22 C23 H23A 109.5 . . ? 
C22 C23 H23B 109.5 . . ? 
H23A C23 H23B 109.5 . . ? 
C22 C23 H23C 109.5 . . ? 
H23A C23 H23C 109.5 . . ? 
H23B C23 H23C 109.5 . . ? 
C22 C24 H24A 109.5 . . ? 
C22 C24 H24B 109.5 . . ? 
H24A C24 H24B 109.5 . . ? 
C22 C24 H24C 109.5 . . ? 
H24A C24 H24C 109.5 . . ? 
H24B C24 H24C 109.5 . . ? 
C26 C25 C27 109.00(15) . . ? 
C26 C25 P2 111.48(12) . . ? 
C27 C25 P2 114.91(13) . . ? 
C26 C25 H25 107.0 . . ? 
C27 C25 H25 107.0 . . ? 
P2 C25 H25 107.0 . . ? 
C25 C26 H26A 109.5 . . ? 
C25 C26 H26B 109.5 . . ? 
H26A C26 H26B 109.5 . . ? 
C25 C26 H26C 109.5 . . ? 
H26A C26 H26C 109.5 . . ? 
H26B C26 H26C 109.5 . . ? 
C25 C27 H27A 109.5 . . ? 
C25 C27 H27B 109.5 . . ? 
H27A C27 H27B 109.5 . . ? 
C25 C27 H27C 109.5 . . ? 
H27A C27 H27C 109.5 . . ? 
H27B C27 H27C 109.5 . . ? 
C30 C28 C29 110.65(15) . . ? 
C30 C28 P2 111.48(12) . . ? 
C29 C28 P2 111.39(13) . . ? 
C30 C28 H28 107.7 . . ? 
C29 C28 H28 107.7 . . ? 
P2 C28 H28 107.7 . . ? 
C28 C29 H29A 109.5 . . ? 
C28 C29 H29B 109.5 . . ? 
H29A C29 H29B 109.5 . . ? 
C28 C29 H29C 109.5 . . ? 
H29A C29 H29C 109.5 . . ? 
H29B C29 H29C 109.5 . . ? 
C28 C30 H30A 109.5 . . ? 
C28 C30 H30B 109.5 . . ? 
H30A C30 H30B 109.5 . . ? 
C28 C30 H30C 109.5 . . ? 
H30A C30 H30C 109.5 . . ? 
H30B C30 H30C 109.5 . . ? 
C32 C31 C33 110.10(14) . . ? 
C32 C31 P3 111.70(12) . . ? 
C33 C31 P3 112.95(12) . . ? 
C32 C31 H31 107.3 . . ? 
C33 C31 H31 107.3 . . ? 
P3 C31 H31 107.3 . . ? 
C31 C32 H32A 109.5 . . ? 
C31 C32 H32B 109.5 . . ? 
H32A C32 H32B 109.5 . . ? 
C31 C32 H32C 109.5 . . ? 
H32A C32 H32C 109.5 . . ? 
H32B C32 H32C 109.5 . . ? 
C31 C33 H33A 109.5 . . ? 
C31 C33 H33B 109.5 . . ? 
H33A C33 H33B 109.5 . . ? 
C31 C33 H33C 109.5 . . ? 
H33A C33 H33C 109.5 . . ? 
H33B C33 H33C 109.5 . . ? 
C36 C34 C35 107.69(14) . . ? 
C36 C34 P3 116.00(12) . . ? 
C35 C34 P3 111.25(12) . . ? 
C36 C34 H34 107.2 . . ? 
C35 C34 H34 107.2 . . ? 
P3 C34 H34 107.2 . . ? 
C34 C35 H35A 109.5 . . ? 
C34 C35 H35B 109.5 . . ? 
H35A C35 H35B 109.5 . . ? 
C34 C35 H35C 109.5 . . ? 
H35A C35 H35C 109.5 . . ? 
H35B C35 H35C 109.5 . . ? 
C34 C36 H36A 109.5 . . ? 
C34 C36 H36B 109.5 . . ? 
H36A C36 H36B 109.5 . . ? 
C34 C36 H36C 109.5 . . ? 
H36A C36 H36C 109.5 . . ? 
H36B C36 H36C 109.5 . . ? 
Fe1 C37 H37A 109.5 . . ? 
Fe1 C37 H37B 109.5 . . ? 
H37A C37 H37B 109.5 . . ? 
Fe1 C37 H37C 109.5 . . ? 
H37A C37 H37C 109.5 . . ? 
H37B C37 H37C 109.5 . . ? 
  
_diffrn_measured_fraction_theta_max    0.994 
_diffrn_reflns_theta_full              30.72 
_diffrn_measured_fraction_theta_full   0.994 
_refine_diff_density_max    0.439 
_refine_diff_density_min   -0.424 
_refine_diff_density_rms    0.076 
