# Supplementary material for: Triggering N2 uptake via redox-induced expulsion of coordinated NH3 and N2 silylation at trigonal bipyramidal iron
Source: Springer Nature journal article supplement (doi:10.1038/nchem.660), 2010-05-16
Supplement: 41557_2010_BFnchem660_MOESM5_ESM.mol [file 41557_2010_BFnchem660_MOESM5_ESM.mol]

  ChemDraw04281014533D

 38 43  0  0  0  0  0  0  0  0999 V2000
   -1.2549   -0.8670   -0.1379 C   0  0  0  0  0  0  0  0  0  0  0  0
   -1.6070   -1.5857   -0.1379 C   0  0  0  0  0  0  0  0  0  0  0  0
   -1.7013   -0.2026   -0.1379 C   0  0  0  0  0  0  0  0  0  0  0  0
    0.0942   -0.5853   -0.1379 Si  0  0  0  0  0  0  0  0  0  0  0  0
   -2.4998   -0.2571   -0.1379 C   0  0  0  0  0  0  0  0  0  0  0  0
   -2.8519   -0.9759   -0.1379 C   0  0  0  0  0  0  0  0  0  0  0  0
   -2.4055   -1.6402   -0.1379 C   0  0  0  0  0  0  0  0  0  0  0  0
   -0.2955   -1.4375   -0.7360 C   0  0  0  0  0  0  0  0  0  0  0  0
   -0.7072   -1.1298    0.1930 C   0  0  0  0  0  0  0  0  0  0  0  0
   -1.2463   -1.7474    0.7911 C   0  0  0  0  0  0  0  0  0  0  0  0
   -1.3737   -2.6727    0.4602 C   0  0  0  0  0  0  0  0  0  0  0  0
   -0.9621   -2.9804   -0.4689 C   0  0  0  0  0  0  0  0  0  0  0  0
   -0.4230   -2.3628   -1.0670 C   0  0  0  0  0  0  0  0  0  0  0  0
    1.5041   -0.4305   -0.1379 C   0  0  0  0  0  0  0  0  0  0  0  0
    0.8530   -0.9371   -0.1379 C   0  0  0  0  0  0  0  0  0  0  0  0
    0.9662   -1.7543   -0.1379 C   0  0  0  0  0  0  0  0  0  0  0  0
    1.7306   -2.0649   -0.1379 C   0  0  0  0  0  0  0  0  0  0  0  0
    2.3816   -1.5582   -0.1379 C   0  0  0  0  0  0  0  0  0  0  0  0
    2.2684   -0.7410   -0.1379 C   0  0  0  0  0  0  0  0  0  0  0  0
    0.1046    0.3939   -0.1379 Fe  0  0  0  0  0  0  0  0  0  0  0  0
    1.3206    0.3892   -0.1379 P   0  0  0  0  0  0  0  0  0  0  0  0
    2.0846   -0.0558   -0.1379 C   0  0  0  0  0  0  0  0  0  0  0  0
    2.8519    0.3834   -0.1379 C   0  0  0  0  0  0  0  0  0  0  0  0
    2.0812   -0.9399   -0.1379 C   0  0  0  0  0  0  0  0  0  0  0  0
    1.3240    1.2733   -0.1379 C   0  0  0  0  0  0  0  0  0  0  0  0
    0.5600    1.7183   -0.1379 C   0  0  0  0  0  0  0  0  0  0  0  0
    2.0913    1.7125   -0.1379 C   0  0  0  0  0  0  0  0  0  0  0  0
   -0.5189   -0.1030   -0.1379 P   0  0  0  0  0  0  0  0  0  0  0  0
   -0.7174    0.4129    0.5037 P   0  0  0  0  0  0  0  0  0  0  0  0
   -0.6931    1.2926    0.4253 C   0  0  0  0  0  0  0  0  0  0  0  0
   -0.8917    1.8085    1.0670 C   0  0  0  0  0  0  0  0  0  0  0  0
   -0.4703    1.6565   -0.2947 C   0  0  0  0  0  0  0  0  0  0  0  0
   -1.2455    0.6705   -0.1379 P   0  0  0  0  0  0  0  0  0  0  0  0
   -1.6630    1.4498   -0.1379 P   0  0  0  0  0  0  0  0  0  0  0  0
   -1.1969    2.2011   -0.1379 C   0  0  0  0  0  0  0  0  0  0  0  0
   -1.6144    2.9804   -0.1379 C   0  0  0  0  0  0  0  0  0  0  0  0
   -0.3132    2.1730   -0.1379 C   0  0  0  0  0  0  0  0  0  0  0  0
    0.1046    1.5478   -0.1379 C   0  0  0  0  0  0  0  0  0  0  0  0
  2  1  1  0      
  1  3  2  0      
  4  8  1  1      
  4  1  1  6      
  3  5  1  0      
  5  6  2  0      
  6  7  1  0      
  7  2  2  0      
  8  9  2  0      
  9 10  1  1      
 10 11  2  0      
 11 12  1  1      
 12 13  2  0      
 13  8  1  0      
 14 15  2  0      
 15 16  1  0      
 16 17  2  0      
 17 18  1  0      
 18 19  2  0      
 19 14  1  0      
  4 15  1  0      
  4 20  1  0      
 20 21  1  0      
 14 21  1  0      
 21 22  1  0      
 21 25  1  0      
 22 23  1  0      
 22 24  1  0      
 25 26  1  0      
 25 27  1  0      
 28  9  1  1      
 28 20  1  1      
 28 29  1  0      
 29 30  1  0      
 30 31  1  0      
 30 32  1  0      
  3 33  1  0      
 20 33  1  6      
 33 34  1  0      
 34 35  1  0      
 35 36  1  0      
 35 37  1  0      
 20 38  1  0      
M  STY  1   1 SUP
M  SLB  1   1   1
M  SAL   1  7  21  22  23  24  25  26  27
M  SBL   1  2  23  24
M  SMT   1 PiPr2
M  SCL   1  
M  SBV   1  23   -1.2160    0.0047
M  SBV   1  24    0.1835   -0.8197
M  STY  1   2 SUP
M  SLB  1   2   2
M  SAL   2  5  28  29  30  31  32
M  SBL   2  2  31  32
M  SMT   2 iPr2^P
M  SCL   2  
M  SBV   2  31   -0.1883   -1.0268
M  SBV   2  32    0.6235    0.4969
M  STY  1   3 SUP
M  SLB  1   3   3
M  SAL   3  5  33  34  35  36  37
M  SBL   3  2  37  38
M  SMT   3 iPr2^P
M  SCL   3  
M  SBV   3  37   -0.4558   -0.8732
M  SBV   3  38    1.3501   -0.2767
M  STY  1   4 SUP
M  SLB  1   4   4
M  SAL   4  1  38
M  SBL   4  1  43
M  SMT   4 M^e
M  SCL   4  
M  SBV   4  43    0.0000   -1.1539
M  END
