# Supplementary material for: Triggering N2 uptake via redox-induced expulsion of coordinated NH3 and N2 silylation at trigonal bipyramidal iron
Source: Springer Nature journal article supplement (doi:10.1038/nchem.660), 2010-05-16
Supplement: 41557_2010_BFnchem660_MOESM20_ESM.mol [file 41557_2010_BFnchem660_MOESM20_ESM.mol]

  ChemDraw04281014533D

 39 44  0  0  0  0  0  0  0  0999 V2000
   -1.2144   12.4798   -0.1796 C   0  0  0  0  0  0  0  0  0  0  0  0
   -1.5665   11.7611   -0.1796 C   0  0  0  0  0  0  0  0  0  0  0  0
   -1.6609   13.1441   -0.1796 C   0  0  0  0  0  0  0  0  0  0  0  0
    0.0538   12.7152   -0.1796 Si  0  0  0  0  0  0  0  0  0  0  0  0
   -2.4594   13.0897   -0.1796 C   0  0  0  0  0  0  0  0  0  0  0  0
   -2.8115   12.3709   -0.1796 C   0  0  0  0  0  0  0  0  0  0  0  0
   -2.3651   11.7066   -0.1796 C   0  0  0  0  0  0  0  0  0  0  0  0
   -0.3360   11.8631   -0.7777 C   0  0  0  0  0  0  0  0  0  0  0  0
   -0.7476   12.1708    0.1513 C   0  0  0  0  0  0  0  0  0  0  0  0
   -1.2867   11.5532    0.7494 C   0  0  0  0  0  0  0  0  0  0  0  0
   -1.4142   10.6279    0.4185 C   0  0  0  0  0  0  0  0  0  0  0  0
   -1.0025   10.3202   -0.5105 C   0  0  0  0  0  0  0  0  0  0  0  0
   -0.4634   10.9378   -1.1086 C   0  0  0  0  0  0  0  0  0  0  0  0
    1.4636   12.8701   -0.1796 C   0  0  0  0  0  0  0  0  0  0  0  0
    0.8126   12.3634   -0.1796 C   0  0  0  0  0  0  0  0  0  0  0  0
    0.9258   11.5462   -0.1796 C   0  0  0  0  0  0  0  0  0  0  0  0
    1.6901   11.2357   -0.1796 C   0  0  0  0  0  0  0  0  0  0  0  0
    2.3412   11.7424   -0.1796 C   0  0  0  0  0  0  0  0  0  0  0  0
    2.2280   12.5596   -0.1796 C   0  0  0  0  0  0  0  0  0  0  0  0
    0.0642   13.6944   -0.1796 Fe  0  0  0  0  0  0  0  0  0  0  0  0
    0.0642   14.8484   -0.1796 C   0  0  0  0  0  0  0  0  0  0  0  0
    0.6618   15.7707   -0.1796 C   0  0  0  0  0  0  0  0  0  0  0  0
    1.2802  -14.4416   -0.1796 P   0  0  0  0  0  0  0  0  0  0  0  0
    2.0441  -14.8866   -0.1796 C   0  0  0  0  0  0  0  0  0  0  0  0
    2.8115  -14.4474   -0.1796 C   0  0  0  0  0  0  0  0  0  0  0  0
    2.0408  -15.7707   -0.1796 C   0  0  0  0  0  0  0  0  0  0  0  0
    1.2835  -13.5575   -0.1796 C   0  0  0  0  0  0  0  0  0  0  0  0
    0.5196  -13.1125   -0.1796 C   0  0  0  0  0  0  0  0  0  0  0  0
    2.0509  -13.1183   -0.1796 C   0  0  0  0  0  0  0  0  0  0  0  0
   -1.3321  -13.8354   -0.1796 P   0  0  0  0  0  0  0  0  0  0  0  0
   -1.8184  -13.0970   -0.1796 P   0  0  0  0  0  0  0  0  0  0  0  0
   -1.4221  -12.3067   -0.1796 C   0  0  0  0  0  0  0  0  0  0  0  0
   -1.9083  -11.5683   -0.1796 C   0  0  0  0  0  0  0  0  0  0  0  0
   -0.5395  -12.2547   -0.1796 C   0  0  0  0  0  0  0  0  0  0  0  0
   -0.5939  -15.5272   -0.1796 P   0  0  0  0  0  0  0  0  0  0  0  0
   -0.7313  -15.0351    0.4914 P   0  0  0  0  0  0  0  0  0  0  0  0
   -0.7203  -14.1530    0.4376 C   0  0  0  0  0  0  0  0  0  0  0  0
   -0.8576  -13.6609    1.1086 C   0  0  0  0  0  0  0  0  0  0  0  0
   -0.5719  -13.7629   -0.2871 C   0  0  0  0  0  0  0  0  0  0  0  0
  2  1  1  0      
  1  3  2  0      
  4  8  1  1      
  4  1  1  6      
  3  5  1  0      
  5  6  2  0      
  6  7  1  0      
  7  2  2  0      
  8  9  2  0      
  9 10  1  1      
 10 11  2  0      
 11 12  1  1      
 12 13  2  0      
 13  8  1  0      
 14 15  2  0      
 15 16  1  0      
 16 17  2  0      
 17 18  1  0      
 18 19  2  0      
 19 14  1  0      
  4 15  1  0      
  4 20  1  0      
 20 21  1  0      
 21 22  1  6      
 20 23  1  0      
 14 23  1  0      
 23 24  1  0      
 23 27  1  0      
 24 25  1  0      
 24 26  1  0      
 27 28  1  0      
 27 29  1  0      
  3 30  1  0      
 20 30  1  6      
 30 31  1  0      
 31 32  1  0      
 32 33  1  0      
 32 34  1  0      
 35  9  1  1      
 35 20  1  1      
 35 36  1  0      
 36 37  1  0      
 37 38  1  0      
 37 39  1  0      
A   21
N2
A   22
Na(THF)3
M  STY  1   1 SUP
M  SLB  1   1   1
M  SAL   1  7  23  24  25  26  27  28  29
M  SBL   1  2  25  26
M  SMT   1 PiPr2
M  SCL   1  
M  SBV   1  25   -1.2160   28.1360
M  SBV   1  26    0.1835   27.3117
M  STY  1   2 SUP
M  SLB  1   2   2
M  SAL   2  5  30  31  32  33  34
M  SBL   2  2  33  34
M  SMT   2 iPr2^P
M  SCL   2  
M  SBV   2  33   -0.3287   26.9795
M  SBV   2  34    1.3963   27.5298
M  STY  1   3 SUP
M  SLB  1   3   3
M  SAL   3  5  35  36  37  38  39
M  SBL   3  2  39  40
M  SMT   3 iPr2^P
M  SCL   3  
M  SBV   3  39   -0.1537   27.6980
M  SBV   3  40    0.6582   29.2216
M  END
